# Supplementary material
Source: publisher figshare collection journal article supplement (https://geolsoc.figshare.com/ndownloader/files/14358572)
Supplement: Supplementary file 1 [file 14358572]

## Sheet: Sheet1
Table S4 Sandstone chemistry ch. 10 Tramway Fm. XRF
Sample name	NZ13-263	NZ213-264	NZ13-265	NZ13-266	NZ13-267	NZ13-269	NZ113-271	NZ13-272	NZ13-273		NZ13-297	NZ13-299	NZ13-300		NZ13-46	NZ13-47	NZ13-49	NZ13-50	NZ-13-52	NZ13-67	N14-98		NZ-13-102	NZ13-103	N14-50
Rock type	med. sandstone	med. sandstone	med. sandstone	med. sandstone	med. sandstone	med. sandstone	med. sandstone	med. sandstone	med. sandstone		med. sandstone	med. sandstone	med. sandstone		med. sandstone	med. sandstone	mudstone	med. sandstone	med. sandstone	med. sandstone	med. sandstone		sandstone	sandstone	med. Sandstone
Region	Maitai River, Nelson area	Maitai River, Nelson area	Maitai River, Nelson area	Maitai River, Nelson area	Maitai River, Nelson area	Maitai River, Nelson area	Maitai River, Nelson area	Maitai River, Nelson area	Maitai River, Nelson area		United Creek (Roding River)	United Creek (Roding River)	United Creek (Roding River)		West Dome, Southland	West Dome, Southland	West Dome, Southland	West Dome, Southland	West Dome, Southland	West Dome, Southland	West Dome, Southland		Lintley Hills, Southland	Lintley Hills, Southland	Lintley Hills, Southland
GPS	S41 30155 E173 38400	S41 30155 E173 38400	S41 30155 E173 38400	S41 30155 E173 38400	S41 30115 E173 38121	S41 30089 E173 38107	S41 30044 E173 38082	S41 29962 E173 38085	S41 29941 E173 37385		S41 35842 E173 29788	S41 35950 E173 29331			S45 60379 E168 23576	S45 60336 E168 23621	S45 60222 E168 23634	S45 60222 E168 23634	S45 60170 E168 23664	S45 60240 E168 23207	E21 38466 N55 00986		S45 68397 E168 44024	S45 68397 E168 44024	E21 56866 N54 88221
Major Elements
SiO2	58.34	45.3958	55.561	61.84	55.2595	68.2897	47.2149	32.4191	61.2953		67.7832	67.7512	24.9849		67.4154	67.67	65.19	63.4644	65.6702	70.4576	68.9205		66.444	72.17	70.1691
Al2O3	12.84	10.1103	11.682	13.8	12.1025	14.8036	10.05	10.9721	16.0886		14.3705	15.0524	6.1272		14.271	14.2782	15.97	16.8708	13.9885	12.9381	13.8195		10.6428	12.75	13.7584
Fe2O3	3.85	2.90445	3.322	4.4	3.6565	4.5627	2.9949	5.0344	6.4375		4.62275	4.8923	2.16315		4.7235	4.96505	5.52	5.7222	6.3226	4.3834	4.6689		9.0454	3.49	3.98985
MgO	1.21	0.8643	1.078	1.41	1.1639	1.4472	0.89445	1.2992	2.2557		1.599	1.47175	0.63135		1.33665	1.28355	1.55	1.3974	1.7574	1.3635	1.576		2.4794	1	1.23615
CaO	9.03	19.497	12.232	6.03	11.5772	1.5075	17.8387	24.634	3.4917		2.36775	1.57325	35.604		3.26625	2.83575	1.19	0.9486	2.8179	2.9492	2.53145		2.1952	1.79	2.1909
Na2O	2.96	2.4723	2.893	2.89	2.9561	3.5376	3.36675	2.56795	3.0694		3.2595	3.8367	0.9108		3.58785	3.3233	2.5	2.0808	2.5351	3.1209	3.3293		4.0572	2.82	3.02505
K2O	2.034	1.5678	2.1054	2.41	2.02704	2.33059	0.96279	1.44231	2.44316		2.1935	2.16905	1.08675		1.44619	1.53529	2.994	2.90394	2.46036	1.49177	1.61737		0.6223	2.179	2.14165
TiO2	0.53	0.45426	0.4873	0.572	0.515	0.62511	0.445215	0.85869	0.79413		0.581175	0.65569	0.259785		0.79998	0.77013	0.703	0.78642	0.90597	0.60196	0.633355		0.7595	0.52	0.533655
MnO	0.061	0.07035	0.0517	0.053	0.06798	0.05427	0.06231	0.25781	0.09373		0.048175	0.070035	0.05796		0.081405	0.062685	0.048	0.04896	0.07676	0.08181	0.08865		0.11466	0.042	0.069345
P2O5	0.112	0.083415	0.0891	0.141	0.12051	0.11658	0.081405	0.715575	0.12257		0.10455	0.141085	0.06003		0.143715	0.12139	0.141	0.14382	0.10403	0.07575	0.09062		0.10094	0.093	0.09648
LOI	8.29	16.04	10.2	6.17	9.91	2.48	15.55	19.8	3.68		2.95	2.55	27.58		2.48	2.79	4.01	5.17	3.24	2.5	2.51		3.3	2.57	2.56
Total	99.257	99.46	99.7015	99.716	99.3562	99.755	99.4615	100.001	99.7718		99.8802	100.164	99.4659		99.5519	99.6353	99.816	99.5373	99.8788	99.964	99.7856		99.7614	99.424	99.7706
Trace Elements
Zn	78.5	75.9	70.9	84.5	80	79.7	76.4	128.8	99.9		79.6	67	77.8		67.2	72.6	100.4	99.6	91.3	80	70.1		78	55.5	63
Cu	18.1	18.7	14.7	20.3	17.8	18.9	25	38.1	25.1		18	21.3	16.8		12.8	13.3	28.2	29.9	33.8	17.8	17.5		17	11.8	11.2
Ni	18.2	17.4	16.7	24.2	19.6	19.8	15.1	20.2	21.5		17.8	40	21.1		12.3	13	18.9	18.2	15.2	19.6	12.3		15.2	12.4	11.1
Cr	43.3	46.9	40.2	47.6	44.4	55.6	38.1	16.7	55.6		49.7	45.4	37		51.6	54.3	49.3	53.6	58.8	44.4	31.3		41.9	35.1	27.5
V	91.8	82.8	74.9	94	88.6	101.8	70.9	173.3	143.6		96.9	110	58		111.5	116.4	124.4	135.3	148	88.6	106.6		92.1	74.9	74.9
Ba	414.9	311.7	379.4	467.9	309.9	435	187.1	282.9	377.7		379.7	420.6	261.7		318.4	327.3	435.1	474.9	319.5	309.9	318.8		601.2	605.4	515.2
Sc	15.4	16.9	14.8	14.6	16.4	13.7	20.1	40	18.9		14.2	14.9	24.7		17.3	17.9	18.7	22.2	26.6	16.4	16.1		14	12	11.9
La	25.3	21.6	21	22.7	18.7	21.8	19.6	11.8	24.1		18.6	20.9	17.7		41.1	26.5	25.5	22.3	24.8	18.7	18.6		23.5	22.9	21.8
Ce	50.2	49	46.7	54.9	46.2	49.5	38.4	26.4	55.8		47.9	43.8	34.5		52.7	53	56.8	45.6	48.2	46.2	44.4		47.7	46.3	48.9
Nd	23.9	23.3	22.1	25.1	22.9	23.9	18.6	18	27		23.5	23	18.2		24.6	26.8	27.7	21.2	27	22.9	21.4		22.5	22.1	23.8
U	1.9	1.1	175.843	2	1.9	2.2	1.1	0.1	2		2	2.1	0.7		1.7	1.9	1.9	1.7	1.7	1.9	1.3		1.5	1.5	1.3
Th	8.4	6.1	197.961	8.6	7.3	8.5	4.3	3	9.5		8.7	7.8	5		7.8	7.9	10.1	10.2	5.3	7.3	7.3		8.8	6.9	7.8
Pb	11.8	9	220.079	14.1	11.5	15.4	9.1	6.1	12.4		14.7	13.8	7.8		10.5	10.2	14.7	16.1	17.7	11.5	11.6		13.6	10.3	11
Nb	7	5.6	6.5	7.5	6.3	7.6	5.1	3.1	8.9		7.5	6.9	3.1		7.1	7.1	8.3	8.3	5.4		6.6		7.3	6.1	6.9
Zr	162.4	139.6	167.5	169.5	160.3	195.2	109.8	123.1	188.6		167.3	164.9	64.7		279.9	286.9	178.6	184.2	237.8		177.5		178	153.3	171.7
Y	23.9	20.2	19.6	26.3	20	25.2	19	36.9	29.3		24.9	24.3	15		25.7	28.9	29.2	22.2	37.3		25.7		23.3	21.2	26
Sr	202.4	267	244.1	202.2	227.2	228.8	254.6	277.2	191.5		182.2	179.7	450		194.5	278.6	167.6	147.1	189.5		207.5		526.4	536.4	591.9
Rb	69	53.2	67.6	81.9	67.6	79.1	32	44	84.7		78.1	73.2	35.3		44.7	51.1	107.1	105.7	98.7		49.9		89.4	68.4	70.2
